# Supplementary material for: Residential household yard care practices along urban-exurban gradients in six climatically-diverse U.S. metropolitan areas
Source: PLoS One. 2019 Nov 13;14(11):e0222630. doi: 10.1371/journal.pone.0222630 (PMC6853287; doi:10.1371/journal.pone.0222630)
Supplement: S2 Table — (DOCX) [file pone.0222630.s002.docx]

S2 Table. Multi-level regression models.

| Model name | Specification | R code | Greek |
| --- | --- | --- | --- |
| Null model | unconditional | glmer(q6_3 ~ 1 + (1| CityPD) + (1 | CityLab), data = tbl, family=binomial(link = "logit")) |  |
| Model 1 | random intercept, fixed slope | glmer(q6_3 ~ scale(INCOME, center=T, scale=F) + (q26_1, center=T, scale=F) + scale(q16_1, center=T, scale=F) + (1 | CityPD) + (1 | CityLab), data = tbl, family=binomial(link = "logit")) |  |
| Model 2 | fixed intercept, random slope | glmer(q6_3 ~ 1 + (scale(INCOME, center=T, scale=F) + scale(q26_1, center=T, scale=F) +scale(q16_1, center=T, scale=F | CityPD) + (1 | CityLab), data = tbl, family=binomial(link = "logit")) |  |
| Model 3 | Random intercept, random slope | glmer(q6_3 ~ scale(INCOME, center=T, scale=F) + scale(q26_1, center=T, scale=F) + scale(q16_1, center=T, scale=F) + (scale(INCOME, center=T, scale=F) + scale(q26_1, center=T, scale=F) + scale(q16_1, center=T, scale=F) | CityPD) + (1 | CityLab), data = tbl, family=binomial(link = "logit")) |  |
